# Supplementary material for: Digital Pathways to Sustainable Tourism Indonesia Insights: Study case Bilebante Village
Source: Research Square preprint supplement (doi:10.21203/rs.3.rs-7824941/v1), 2025-12-16
Supplement: Supplementary file 1 [file 308b500981300e3ef5c96ddc.docx]

**Appendices**

**Appendix A. Interview Guide and Sample Extracts**

Research Title: Development of a Tourism Transportation System in the Mandalika Region of West Nusa Tenggara

Research Period: Field data collection conducted in mid-November 2022

Data Source Note: The qualitative excerpts presented below are based on interviews conducted with key stakeholders and supported by primary survey data compiled in Kuesioner_-_Preferensi_(Jawaban).xlsx (Sheet “coding”).

| Category | Target Respondent | Institution / Role | Rationale |
| --- | --- | --- | --- |
| Regional Government | Officials from Central Lombok Tourism and Transportation Offices | Policy and infrastructure planning | To understand public policy frameworks and investment priorities |
| Village Government | Head of Bilebante Village | Local coordination | To capture integration between village programs and regional tourism planning |
| Community Tourism Group (Pokdarwis) | Chairperson and active members of 'Jari Sholah' | Local tourism implementers | Insights into operational practices and local participation |
| Tourism Transport Operators | Drivers, shuttle owners, local rental service providers | Transport providers | Experience in mobility management and service challenges |
| Tourists / Visitors | Domestic and international travelers | Service users | Perceptions of accessibility, digital information, and satisfaction |
| Partner Institutions | Universities, NGOs, private sectors | Supporting institutions | Collaboration and technology transfer roles |

**Sample Interview Extracts**

**Excerpt 1 – Community Tourism Group (Pokdarwis)**

Interview conducted by Tania (Research Interviewer), November 2022, Bilebante Village, Central Lombok.

Tania: How has the improvement of transportation influenced tourism activity in Bilebante?
Respondent ( Pokdarwis): “After the road repairs were completed, the number of visitors increased a lot. Many come using rental cars or motorcycles from Mandalika or Mataram, and that helps our homestays and food vendors.”

Tania: What kind of coordination do you have with the local government or transport office?
Respondent: “We regularly coordinate with the Tourism Office, especially during MotoGP and local festivals. They assist us in scheduling shuttle services and also promote our routes on Google Maps and the regency’s tourism website.”

Tania: How has digitalisation affected local tourism promotion?
Respondent: “Digitalisation has changed how we promote Bilebante. We use WhatsApp groups and Instagram for daily updates, and the Pokdarwis account is often tagged by the Tourism Office. Some of our members were trained to upload tourism locations on Google Maps and share QR codes for visitors.”

Tania: Are there any challenges in managing community transport?
Respondent: “Fuel and maintenance costs are still high, but because our visibility on digital media has grown, we get more visitors. Tourists often say they found us through social media or government websites.”

Additional probing questions:

How do online promotions reflect in actual visitor numbers?

Are digital tools like Google Maps and Instagram integrated into Pokdarwis’ routine planning?

**Excerpt 2 – Tourism Transport Operator**

Interview conducted by Tania (Research Interviewer), November 2022, Praya, Central Lombok.

Tania: How do you support tourist mobility around Mandalika?
Respondent (Local Driver): “We connect the airport, Mandalika Circuit, and nearby villages like Bilebante. Many tourists contact us directly via WhatsApp after seeing posts from the Tourism Office or Pokdarwis accounts.”

Tania: Do you use any digital tools for your service?
Respondent: “Yes, Google Maps and Waze are essential for route planning. We also share our live location with tourists. Some of us attended digital training by the Tourism Office to learn how to update our routes and add our service to online maps.”

Tania: How has digital promotion affected your business?
Respondent: “It helps a lot. The local government posts transport contacts on their website and social media. When they feature our routes, bookings increase—especially during weekends and events.”

Tania: What challenges do you face?
Respondent: “The signal isn’t always strong, and sometimes tourists get outdated info online. If there were a single digital platform for local transport, it would make coordination much easier.”

Additional probing questions:

How do you monitor demand through online channels?

What improvements would you suggest for government-led digital systems?

**Excerpt 3 – Tourist / Visitor**

Interview conducted by Tania (Research Interviewer), November 2022, Mandalika Tourism Area.

Tania: What was your experience traveling to nearby destinations such as Bilebante?
Respondent (Domestic Tourist): “The road was good and easy to follow using Google Maps. There were only a few signs, but the route was clear, and people were helpful.”

Tania: Did you use any online resources to plan your trip?
Respondent: “Yes, I followed the official ‘Explore Lombok’ Instagram page and saw videos promoting eco-tourism in Bilebante. That’s how I decided to visit.”

Tania: How do you evaluate the transport services overall?
Respondent: “It’s quite comfortable, though public transport could be more organised. It would be great if all travel options were listed on one website or app.”

Tania: What improvements would you suggest for digital tourism promotion?
Respondent: “More QR codes and updated links on social media. Also, government websites could feature direct contact info for local drivers and Pokdarwis.”

*All interviews were conducted in Bahasa Indonesia and translated into English for analysis. NVivo-assisted thematic coding identified five major themes: accessibility, digitalisation, coordination, community participation, and tourist experience. The authors restructured and synthesised the interview narratives to align them with the analytical perspective of the journal article, particularly to emphasise the dimension of digitalisation in local tourism governance and practice. Supporting evidence of digitalisation and promotion efforts can be verified in the accompanying Excel dataset and the LPPD or online media managed by the Central Lombok Regency Government and Bilebante tourism actors.*

**Appendix B. Coding Framework and Thematic Analysis Table**

| Theme | Sub-theme | Representative Code / Survey Variable (from Excel – Sheet 'coding') | Source (Respondent Type) | Interpretation / Supporting Evidence |
| --- | --- | --- | --- | --- |
| Accessibility and Connectivity | Ease of travel to Mandalika | Aksesibilitas/kemudahan untuk melakukan perjalanan menuju lokasi Mandalika? (mayoritas 'Mudah' – 'Agak mudah') | Tourists | High accessibility encourages more independent travel using private/rental vehicles. |
| Accessibility and Connectivity | Road infrastructure quality | Kesan terhadap jaringan dan rute jalan menuju lokasi Mandalika? (dominan 'Baik') | Tourists / Drivers | Improved roads support tourism mobility and connect peripheral villages such as Bilebante. |
| Public Transport Condition | Service quality – safety, comfort, speed | Kondisi layanan angkutan umum [Keamanan, Kenyamanan, Kecepatan] ('Baik' – 'Agak baik') | Tourists / Operators | Indicates partial satisfaction; quality varies with route coverage and vehicle condition. |
| Public Transport Condition | Availability and route diversity | Ketersediaan layanan angkutan umum ('Sedikit', 'Sangat sedikit'); Keragaman rute | Tourists | Limited frequency and route coverage lead to preference for private modes. |
| Transport Mode Preference | Mode selection | Moda transportasi yang digunakan (dari Bandara/Hotel/Rumah) → Mobil sewa & motor pribadi dominant | Tourists | Shows reliance on flexible, self-arranged mobility rather than structured public transport. |
| Transport Mode Preference | Motivation / reason for choice | Alasan memilih moda transportasi (cepat, aman, nyaman, praktis, milik sendiri) | Tourists / Drivers | Convenience and autonomy drive transport mode decisions. |
| Community Participation and Coordination | Local partnership | Interview data: collaboration between Pokdarwis and Tourism Office for shuttle management | Pokdarwis / Government Officers | Demonstrates bottom-up coordination aligning local initiatives with government promotion. |
| Community Participation and Coordination | Benefit distribution | Interview – economic effects on homestays and vendors | Pokdarwis | Transport improvement and tourist influx support community income diversification. |
| Digitalisation and Promotion | Online visibility and digital mapping | Interview + field note: 'Pokdarwis members trained to upload locations on Google Maps.' | Pokdarwis / Operators | Reflects grassroots adaptation to digital tools for tourism promotion. |
| Digitalisation and Promotion | Government & stakeholder digital platforms | Cross-reference with LPPD and official social media (Explore Lombok, Central Lombok Tourism) | Local Gov / Tourists | Integration of transport and tourism data online strengthens destination branding. |
| Digitalisation and Promotion | Digital interaction with tourists | Excel ('Kesan ketersediaan layanan angkutan umum') + Interview: 'Tourists contact via WhatsApp, Instagram' | Tourists / Operators | Tourists rely on informal digital networks rather than centralised systems. |
| Tourist Experience | Trip satisfaction | Excel – road quality & safety + Interview: 'Route was easy using Google Maps.' | Tourists | Positive experience shaped by physical access and digital guidance. |
| Tourist Experience | Expectation for digital integration | Interview – demand for online shuttle information and QR codes | Tourists | Highlights opportunity for smart-tourism applications and unified online transport systems. |

Themes 1–3 derive from quantitative indicators in the Excel dataset (e.g., accessibility ratings, modal preferences, service evaluations).

Themes 4–6 emerge from qualitative interviews conducted in November 2022. Together, they provide a mixed-methods understanding of how transport development and digitalisation influence sustainable tourism mobility in the Mandalika region.

The author reconstructed the coding structure to integrate quantitative survey dimensions with qualitative insights, aligning the framework with the journal’s analytical focus on digitalisation in tourism governance.
