# Supplementary material for: Digital Pathways to Sustainable Tourism Indonesia Insights: Study case Bilebante Village
Source: Research Square preprint supplement (doi:10.21203/rs.3.rs-7824941/v1), 2025-12-16
Supplement: Supplementary file 2 [file d7c59ed93dc0167f2fcd0522.xlsx]

## Sheet: Form Responses 1
	Timestamp	Nama	Alamat (Kecamatan/Kabupaten/Negara)	Nomor Telepon / HP	Jenis Kelamin	Usia Responden	Pendidikan Terakhir	Pekerjaan responden	Pendapatan responden per bulan	1. Kunjungan ke berapa kali anda ke lokasi Mandalika?	2. Apa objek wisata yang dituju pada lokasi KEK Mandalika?	3. Moda transportasi apa yang anda gunakan untuk menuju lokasi Mandalika (dari Bandara/Hotel/Rumah)?	4. Apa alasan anda memilih menggunakan moda transportasi tersebut?	5. Kesan anda tentang aksesibilitas/kemudahan untuk melakukan perjalanan menuju lokasi Mandalika?	6. Kesan anda terhadap jaringan dan rute jalan menuju lokasi Mandalika?	7. Kesan anda tentang ketersediaan layanan angkutan umum menuju lokasi Mandalika?	8. Kesan anda tentang kondisi layanan angkutan umum (yang anda gunakan) menuju lokasi Mandalika? [Keamanan]	8. Kesan anda tentang kondisi layanan angkutan umum (yang anda gunakan) menuju lokasi Mandalika? [Kenyamanan]	8. Kesan anda tentang kondisi layanan angkutan umum (yang anda gunakan) menuju lokasi Mandalika? [Kecepatan]	8. Kesan anda tentang kondisi layanan angkutan umum (yang anda gunakan) menuju lokasi Mandalika? [Keterjangkauan tarif]	8. Kesan anda tentang kondisi layanan angkutan umum (yang anda gunakan) menuju lokasi Mandalika? [Ketersediaan setiap waktu]	8. Kesan anda tentang kondisi layanan angkutan umum (yang anda gunakan) menuju lokasi Mandalika? [Keragaman jenis moda]	8. Kesan anda tentang kondisi layanan angkutan umum (yang anda gunakan) menuju lokasi Mandalika? [Keragaman rute]	9. Berdasarkan pengalaman memanfaatkan aksesibilitas transportasi (sistem) tersedia menuju Mandalika, saya bermaksud akan berkunjung kembali di waktu yang akan datang?	10. Berdasarkan pengalaman memanfaatkan aksesibilitas transportasi (sistem) tersedia menuju Mandalika, saya bermaksud akan merekomendasikan angkutan tersebut ke teman/keluarga/ orang lain untuk berkunjung ke Mandalika	11. Menurut saya perbaikan sistem transportasi menuju ke lokasi Mandalika merupakan faktor penting untuk lebih meningkatkan jumlah pengunjung dan frekuensi kunjungan.	12. Seberapa penting memperbaiki kondisi infrastruktur jalan menuju lokasi Mandalika?	13. Seberapa penting membangun infrastruktur jalan atau rute baru menuju lokasi wisata Mandalika?	14. Seberapa penting memperbaiki dan melengkapi fasilitas/ perlengkapan jalan (rambu, marka, Alat Pemberi Isyarat Lalu Lintas (Traffic Light)) menuju lokasi wisata Mandalika untuk menjamin keamanan perjalanan?	15. Seberapa penting memperbaiki dan melengkapi fasilitas (Toilet, Rest Area, Pom Bensin/Mini ) menuju lokasi wisata Mandalika untuk menjamin keamanan perjalanan?	16. Seberapa penting memperbaiki kondisi layanan angkutan umum eksisting menuju lokasi wisata Mandalika? (Jika pernah menggunakan angkutan umum) [Keamanan]	16. Seberapa penting memperbaiki kondisi layanan angkutan umum eksisting menuju lokasi wisata Mandalika? (Jika pernah menggunakan angkutan umum) [Kenyamanan]	16. Seberapa penting memperbaiki kondisi layanan angkutan umum eksisting menuju lokasi wisata Mandalika? (Jika pernah menggunakan angkutan umum) [Kecepatan]	16. Seberapa penting memperbaiki kondisi layanan angkutan umum eksisting menuju lokasi wisata Mandalika? (Jika pernah menggunakan angkutan umum) [Keterjangkauan tarif]	16. Seberapa penting memperbaiki kondisi layanan angkutan umum eksisting menuju lokasi wisata Mandalika? (Jika pernah menggunakan angkutan umum) [Ketersediaan setiap waktu]	16. Seberapa penting memperbaiki kondisi layanan angkutan umum eksisting menuju lokasi wisata Mandalika? (Jika pernah menggunakan angkutan umum) [Keragaman jenis moda]	16. Seberapa penting memperbaiki kondisi layanan angkutan umum eksisting menuju lokasi wisata Mandalika? (Jika pernah menggunakan angkutan umum) [Keragaman rute]	17. Urutkan moda transportasi berikut dari yang paling disukai hingga yang paling tidak disukai a. Mobil pribadi b. Mobil sewa c. Motor pribadi d. Motor sewa e. Mobil travel / wisata f. Angkutan umum g.Transportasi online h. Sepeda Misalnya: c,a,g,b... dst.
1	2022-11-25 14:18:14	Risky Catur Wulan	Duren Sawit/DKI Jakarta/Indonesia	081213580642	Perempuan	38	D3	Swasta / Wiraswasta	7,5 - < 10,0 juta	Ke-2	Bukit Merese, Pantai Seger	Mobil sewa	Waktu tempuh yang cepat, Aman, Nyaman, Praktis, Fleksibel, Biaya terjangkau	Mudah	Agak baik	Sedikit	Baik	Baik	Baik	Baik	Agak baik	Buruk	Agak baik	Sangat setuju	Setuju	Setuju	Sangat penting	Penting	Sangat penting	Sangat penting	Sangat penting	Sangat penting	Sangat penting	Sangat penting	Sangat penting	Sangat penting	Sangat penting	a,c,d,e,f,g,h
2	2022-11-25 14:36:08	Asa bhasqara	Selaparang	081936727332	Laki laki	32	SMA	Swasta / Wiraswasta	< 2,5 juta	>4 kali	Pantai	Motor pribadi	Milik sendiri	Sangat mudah	Baik	Sangat sedikit	Baik	Baik	Baik	Agak baik	Agak baik	Buruk	Buruk	Sangat setuju	Sangat setuju	Sangat setuju	Sangat penting	Sangat penting	Sangat penting	Sangat penting	Sangat penting	Sangat penting	Sangat penting	Sangat penting	Sangat penting	Sangat penting	Sangat penting	c,a,d,b,h,f,g,e
3	2022-11-26 08:53:11	MOHAMAD HABIBULLAH	Bandung	08175730081	Laki laki	40	S3	PNS/BUMN	> 30 juta	Ke-4	Pantai	Mobil sewa	Praktis	Agak mudah	Baik	Sangat sedikit	Agak baik	Agak baik	Agak baik	Buruk	Sangat buruk	Sangat buruk	Buruk	Sangat tidak setuju	Sangat tidak setuju	Setuju	Sangat penting	Sangat penting	Sangat penting	Sangat penting	Agak penting	Agak penting	Agak penting	Agak penting	Agak penting	Agak penting	Agak penting	A, f, g
4	2022-11-26 09:26:12	Nabila Mauladina	Kamasan monjok/Selaparang/Mataram/Indonesia	081907827863	Perempuan	20 tahun	SMK	Mahasiswa		>4 kali	bukit merese dan bukit seger	Motor pribadi	Waktu tempuh yang cepat	Mudah	Baik	Tidak tahu	Baik	Baik	Baik	Baik	Baik	Baik	Baik	Setuju	Setuju	Setuju	Sangat penting	Penting	Sangat penting	Sangat penting	Penting	Penting	Penting	Penting	Penting	Penting	Penting	C, A, E, G , F
5	2022-11-26 13:50:45	Yudho Fajrian Abdillah	Jagakarsa jakarta selatan	081280939474	Laki laki	30 thn	S1	Wirausaha	2,5 - < 5,0 juta	>4 kali	Bukit marese / tasty hesty cafe	Mobil pribadi	Milik sendiri	Sulit	Buruk	Sangat sedikit	Agak baik	Agak baik	Agak baik	Buruk	Agak baik	Buruk	Agak baik	Sangat setuju	Tidak setuju	Sangat setuju	Sangat penting	Agak penting	Sangat penting	Sangat penting	Sangat penting	Sangat penting	Penting	Sangat penting	Sangat penting	Sangat penting	Penting	A,C,B,D,E,G,F,H
6	2022-11-26 16:55:09	David	Praya, Jonggat, Loteng	081934858384	Laki laki	25	SMK	PNS/BUMN	2,5 - < 5,0 juta	>4 kali	pantai	Motor pribadi	Aman, Nyaman, Fleksibel, Biaya terjangkau, Milik sendiri	Agak mudah	Baik	Cukup banyak	Baik	Baik	Baik	Baik	Agak baik	Baik	Baik	Sangat setuju		Sangat setuju	Sangat penting	Sangat penting	Sangat penting	Penting	Penting	Penting	Penting	Penting	Penting	Penting	Penting	c, e, h
7	2022-11-26 16:56:49	Yheni Mulyaningsih	Setiabudi, Jakarta, Indonesia	081310801113	Perempuan	23	S1	Swasta / Wiraswasta	10,0 - < 15,0 juta	Ke-1	Sirkuit, pantai	Mobil pribadi	Waktu tempuh yang cepat, Aman, Nyaman, Praktis, Fleksibel, Biaya terjangkau	Agak mudah	Sangat baik	Tidak tahu	Agak baik	Agak baik	Agak baik	Agak baik	Agak baik	Agak baik	Agak baik	Setuju	Setuju	Sangat setuju	Sangat penting	Sangat penting	Sangat penting	Sangat penting	Sangat penting	Sangat penting	Sangat penting	Sangat penting	Sangat penting	Sangat penting	Sangat penting	A, b, e, g, c, d, f
8	2022-11-26 16:59:54	Auliawindari	Karangpanas, Ampenan	087865753241	Perempuan	21	S1	Mahasiswi	< 2,5 juta	>4 kali	Pantai Kuta	Motor pribadi	Nyaman	Mudah	Baik	Cukup banyak	Baik	Baik	Baik	Baik	Baik	Baik	Baik	Setuju	Setuju	Setuju	Penting	Penting	Penting	Penting	Sangat penting	Sangat penting	Sangat penting	Sangat penting	Sangat penting	Sangat penting	Sangat penting	a, c, e, f, g, b, d, h
9	2022-11-26 17:06:56	Rieka Melania Ilhami	Jerowaru, Lombok Timur	083117131356	Perempuan	23	S1	Swasta / Wiraswasta	10,0 - < 15,0 juta	Ke-3	Sepeda listrik	Motor pribadi	Nyaman, Praktis, Biaya terjangkau, Milik sendiri	Mudah	Baik	Sangat sedikit								Setuju	Agak setuju	Sangat setuju	Sangat penting		Penting	Sangat penting								a, c, b, e, g, f, d, h
10	2022-11-26 17:09:01	Faiqnailul Irhasy	Lamongan, Lamongan, Indonesia	085706583540	Laki laki	26	S1	Swasta / Wiraswasta	5,0 - < 7,5 juta	Ke-1	Pantai kuta	Mobil pribadi	Stigma sosial/prestige	Agak mudah	Baik	Tidak tahu	Baik	Sangat baik	Sangat baik	Baik	Baik	Baik	Baik	Setuju	Sangat setuju	Sangat setuju	Sangat penting	Penting	Sangat penting	Sangat penting	Sangat penting	Sangat penting	Penting	Sangat penting	Sangat penting	Sangat penting	Sangat penting	F, g, e, b, c, a, h
11	2022-11-26 17:12:58	Fety	Mataram	0818391401	Laki laki	38	SMA	Ibu Rumah Tangga		>4 kali	Pantai, motor listrik	Mobil pribadi	tidak ada kendaraan umum	Sangat mudah	Baik	Sangat sedikit								Sangat setuju	Setuju		Sangat penting	Tidak penting	Sangat penting	Sangat penting	Penting	Penting	Penting	Penting	Penting	Penting	Penting	a, b, e, c, d, f, 7, 8
12	2022-11-26 17:14:06	Rania	Lombok Tengah	087765209213	Perempuan	40	Sma	Swasta / Wiraswasta	2,5 - < 5,0 juta	Ke-2	Pantai	Mobil pribadi	Aman	Mudah	Baik	Sedikit								Setuju	Setuju	Setuju	Penting	Penting	Penting	Penting	Penting	Penting	Penting	Penting	Penting	Penting	Penting	A,b,c,d,e,f,g,h
13	2022-11-26 17:16:39	Saru Ayana	Seketeng, Sumbasa besar	085339232506	Perempuan	23	SMA		< 2,5 juta	Ke-1	Sirkuit	Motor pribadi	Milik sendiri	Mudah	Baik	Cukup banyak	Baik	Baik	Baik	Baik	Agak baik	Baik	Baik	Sangat setuju	Setuju	Sangat setuju	Sangat penting	Sangat penting	Sangat penting	Sangat penting	Sangat penting	Sangat penting	Sangat penting	Sangat penting	Sangat penting	Sangat penting	Sangat penting	a, c, b, d, f, e, g, h
14	2022-11-26 17:21:12	Edi	Praya Timur	087863547164	Laki laki	29	S1	Swasta / Wiraswasta	< 2,5 juta	>4 kali	Aan, Seger, Merese	Motor pribadi	Waktu tempuh yang cepat, Nyaman, Biaya terjangkau, Milik sendiri	Sulit	Agak baik	Sedikit	Agak baik	Baik	Agak baik	Agak baik	Buruk	Buruk	Sangat baik	Sangat setuju	Setuju	Sangat setuju	Agak penting	Sangat tidak penting	Penting	Sangat penting	Penting	Penting	Agak penting	Agak penting	Sangat penting	Penting	Tidak penting	c, f, d, a, b, g, h
15	2022-11-26 17:26:27	Aaua Kallio	Finland		Perempuan	22	S1	Arsitek	15,0 - < 20,0 juta		Pantai tanjung Aan	Motor sewa	Fleksibel, Biaya terjangkau	Sulit	Baik	Tidak tahu	Baik	Agak baik	Baik	Baik	Agak baik	Agak baik	Agak baik	Agak setuju	Agak setuju	Agak setuju	Penting	Tidak penting	Penting	Penting	Penting	Sangat penting	Tidak penting	Agak penting	Penting	Penting	Agak penting	D,c,b,a,f,e,g,h
16	2022-11-26 17:30:59	Lukman	Tenara, Lombok Timur	081918380304	Laki laki	45	Sma	Swasta / Wiraswasta	5,0 - < 7,5 juta	>4 kali	Sirkuit, bukit merese, tanjung Aan, kuta	Motor pribadi	Aman, Nyaman, Praktis, Milik sendiri	Sangat mudah	Sangat baik	Sangat sedikit	Baik	Buruk	Buruk	Buruk	Buruk	Buruk	Sangat buruk	Sangat setuju	Setuju	Sangat setuju	Agak penting	Tidak penting	Penting	Penting	Penting	Penting	Penting	Penting	Penting	Penting	Penting	A,b,e,f,g
17	2022-11-26 17:31:32	Imam Gozali	Penujak, Loteng	081775284715	Laki laki	25	SMA	Swasta / Wiraswasta	< 2,5 juta	>4 kali	Tanjung Aan, Sirkuit Mandalika, Bukit Merese, Pantai Seger	Mobil pribadi	Aman, Nyaman	Agak mudah		Sangat sedikit	Agak baik	Baik	Baik	Buruk	Baik	Buruk	Baik	Sangat setuju	Setuju	Sangat setuju	Sangat penting	Penting	Sangat penting		Penting	Agak penting	Tidak penting	Penting	Tidak penting	Penting	Tidak penting	a,c,g,b,d,f,h
18	2022-11-26 17:35:36	Mila Rantangin	Finland		Perempuan	28	S1	Traveller	> 30 juta	>4 kali	Grupuk, Tanjung Aan, Kuta	Mobil sewa	Waktu tempuh yang cepat	Sangat mudah	Sangat baik	Tidak tahu	Baik	Baik	Baik	Baik	Baik	Baik	Baik	Sangat setuju	Setuju	Setuju	Penting	Penting	Sangat penting	Penting	Penting	Penting	Penting	Penting	Penting	Penting	Penting	A,b,c,d,e,f,g,h
19	2022-11-27 11:28:58	Julihan	Gunung Sari, Lobar		Laki laki	22	S1	Swasta / Wiraswasta	< 2,5 juta	>4 kali	Tanjunh Aan,	Motor pribadi	Aman, Biaya terjangkau	Sangat mudah	Baik	Sangat sedikit								Sangat setuju	Setuju	Agak setuju	Penting	Agak penting	Penting	Agak penting	Penting	Sangat penting	Penting	Tidak penting	Sangat penting	Penting	Penting	C, D, G,B,E,A,F,H
20	2022-11-27 11:39:22	Nuzul Rijalul	Lombok Timur (Batam)	081935392336	Laki laki	21	S1 Spd	Mahasiswa	< 2,5 juta	>4 kali	Kuta, Tanjung Aan, Bukit Merese	Motor pribadi	Waktu tempuh yang cepat, Nyaman, Praktis, Fleksibel, Biaya terjangkau	Agak mudah	Agak baik	Sangat sedikit								Setuju	Sangat setuju	Sangat setuju	Penting	Sangat tidak penting	Penting	Sangat penting	Sangat penting	Agak penting	Penting	Penting	Sangat penting	Sangat penting	Penting	C, A, D, F, B, G, H
21	2022-11-27 11:43:48	M Nurjannah	Sakra Barat, Lotim	-	Laki laki	20	S1	Mahasiswa	< 2,5 juta	>4 kali	Kuta, Tanjung Aan	Motor pribadi	Waktu tempuh yang cepat, Nyaman, Biaya terjangkau	Mudah	Baik	Sangat sedikit								Setuju	Setuju	Setuju	Penting	Sangat tidak penting	Penting	Agak penting								C, D, A, B, F, E, G, H
22	2022-11-27 14:07:12	Murtiadi	Nyerot, Lombok Tengah	0878822893601	Laki laki	43	SD tdk lulus	Buruh bangunan	< 2,5 juta	>4 kali	Pantai Aan	Mobil pribadi	Aman, Nyaman	Mudah	Sangat baik	Tidak tahu								Sangat setuju	Sangat setuju	Setuju	Penting	Penting	Penting	Penting	Penting	Penting	Penting	Agak penting	Penting	Penting	Penting	a, c, b, d
23	2022-11-27 14:10:17	L. Pranata Dharma P	Kopang, Kab Lombok Tengah	081916018616	Laki laki	27	S1	Swasta / Wiraswasta	2,5 - < 5,0 juta	>4 kali	Pantai, Sirkuit	Mobil pribadi	Nyaman, Praktis, Fleksibel	Sangat mudah	Baik	Cukup banyak	Agak baik	Baik	Baik	Baik	Baik	Agak baik	Agak baik	Setuju	Setuju	Setuju	Sangat penting	Sangat penting	Sangat penting	Sangat penting	Penting	Penting	Penting	Sangat penting	Sangat penting	Sangat penting	Penting	c, a, b, d, g, f, e, h
24	2022-11-27 14:13:10	Delphine	Ireland	00447583260743	Perempuan	26	S1	Social Media Manager	> 30 juta	Ke-2	Pantai, air terjun	Kapal dari Gili, kemudian taksi, dan sewa motor di Mandalika	Aman, Nyaman, Biaya terjangkau, Ketemu banyak orang lokal	Mudah	Baik	Tidak tahu								Sangat setuju	Setuju	Setuju	Tidak penting	Tidak penting	Penting	Penting	Sangat penting	Sangat penting	Sangat penting	Sangat penting	Sangat penting	Sangat penting	Sangat penting	D, b, f
25	2022-11-27 14:13:50	Agmad Wirahadi	Desa Jago, Kec Praya, Kab Lombok Tengah	082340534336	Laki laki	35	S1	PNS/BUMN	2,5 - < 5,0 juta	>4 kali	Tanjung Aan	Mobil pribadi	Waktu tempuh yang cepat, Aman, Nyaman, Praktis, Fleksibel, Biaya terjangkau, Milik sendiri	Sangat mudah	Baik	Sedikit									Sangat setuju	Sangat setuju		Sangat penting	Sangat penting	Sangat penting	Sangat penting	Sangat penting	Sangat penting	Sangat penting	Sangat penting	Sangat penting	Sangat penting	a, c, f, g, h, d, b
26	2022-11-27 14:34:52	Moa	Sweden		Perempuan	20	Sma	Film production	> 30 juta	Ke-1	Kuta	Transportasi online	Aman	Sulit	Buruk	Cukup banyak	Sangat buruk	Sangat buruk	Sangat buruk	Sangat buruk	Sangat buruk	Sangat buruk	Sangat buruk	Sangat setuju	Setuju	Setuju	Agak penting	Sangat penting	Agak penting	Sangat penting	Tidak penting	Tidak penting	Tidak penting	Tidak penting	Tidak penting	Tidak penting	Tidak penting	A,g,h,b,c,d,f
27	2022-11-27 15:00:37	Max Rehn	Sweden	+467364557	Laki laki	21	Sma	TNI/POLRI	> 30 juta	Ke-1	Kuta	Motor sewa	Waktu tempuh yang cepat, Nyaman, Praktis, Fleksibel, Biaya terjangkau	Sangat sulit	Sangat baik	Tidak tahu	Sangat buruk			Baik	Baik			Setuju	Sangat setuju	Tidak setuju	Sangat penting	Penting	Sangat penting	Agak penting	Penting							D,b,a,g,h,e,c,f
28	2022-11-27 15:08:53	Nina	Netherland		Perempuan	24	S1	Manager	20,0 - < 30,0 juta	Ke-1	Kuta from labuan bajo	By bout from flores, di mandalika sewa motor	Waktu tempuh yang cepat, Nyaman, Fleksibel, Biaya terjangkau	Sulit	Baik	Tidak tahu	Baik	Baik	Baik	Agak baik	Baik	Baik	Sangat baik	Setuju	Sangat setuju	Setuju	Agak penting	Agak penting	Penting	Tidak penting	Tidak penting	Agak penting		Tidak penting	Penting	Penting	Agak penting	D,c,b,f,g,e,a,h
29	2022-11-27 16:23:26	Anita	Kec.bolo/bima	082340811323	Perempuan	19	SMA	Mahasiswa		Ke-1	Bukit marese	Motor pribadi	Waktu tempuh yang cepat, Praktis, Biaya terjangkau, Milik sendiri	Agak mudah	Agak baik	Tidak tahu								Setuju	Setuju	Setuju	Penting	Tidak penting	Penting	Penting	Penting	Penting	Penting	Penting	Penting	Penting	Penting	C,a,e,g
30	2022-11-27 16:27:40	Retno Wulandari	Praya		Perempuan	41	SMA		< 2,5 juta	>4 kali	Tanjung Aan, Bukit Merese	Motor pribadi	Fleksibel, Biaya terjangkau	Mudah		Sangat sedikit								Setuju		Setuju	Tidak penting	Penting	Penting	Sangat penting	Sangat penting	Penting	Penting	Penting	Sangat penting	Sangat penting	Penting	C, A,G, F, D, B, E, H
31	2022-11-27 16:45:04	Saida Madhe	Ende NTT (Mataram)	082339697274	Perempuan	22	SMA	Mahasiswa	< 2,5 juta	Ke-1	Bukit Merese	Motor pribadi	Waktu tempuh yang cepat, Praktis, Biaya terjangkau	Sulit	Buruk	Sangat sedikit								Sangat setuju	Setuju	Setuju	Penting	Tidak penting	Sangat penting	Sangat penting								C, A, E, D, B, F, H,
32	2022-11-27 16:54:50	Arya A. Majid	Asrama gebang 742 SWY	082339655194	Laki laki	19	Sman	Mahasiswa		Ke-2	Bukit Merese	Motor pribadi	Milik sendiri	Agak mudah	Sangat baik	Banyak	Baik	Sangat baik	Baik	Agak baik	Baik	Baik	Sangat baik	Setuju	Agak setuju	Sangat setuju	Sangat penting	Penting	Sangat penting	Sangat penting	Sangat penting	Sangat penting	Agak penting	Sangat penting	Agak penting	Penting	Sangat penting	A,c,f,e,b,d,g,h
33	2022-11-26 17:23:48	Martina	Germany		Female	28	Bachelor	Vacation	> 30	1	Pantai Tanjung Aan	Private motorcycle	Fast travel time, Comfortable, Simple, Personal/own the transportation	Difficult	Easy	Few								Agree	Absolutely agree	Agree			Absolutely agree	Absolutely agree								D,B,G,C,A,F,E,H
34	2022-11-26 17:27:50	Onni Mamikkamaki	Findland		Male	22	Bachelor of Science	Data Engineer	> 30	1	Gerupuk, Tanjunga Aan	Rent/hired motorcycle	Fast travel time, Flexible, Affordable	Difficult	Easy	Don't know	Good	Good	Best	Good		Bad	Less good	Agree	Absolutely agree	Kinda agree	Kinda agree	Absolutley disagree	Agree	Agree	Agree	Kind agree	Kind agree	Agree	Agree	Absolutely agree	Disagree	d, c, b, a, e, f, g, h
35	2022-11-26 17:30:59	Lisa	Germany		Female	29		Marketing	15,0 - < 20,0	1	Almost everywhere in Lombok	Private motorcycle	Personal/own the transportation	Easy	Easy	Few	Bad	Bad	Good	Good	Good	Less good	Less good	Absolutely agree	Kinda agree	Agree	Absolutely agree	Disagree	Agree	Agree	Absolutely agree	Absolutely agree	Agree	Agree	Absolutely agree	Absolutely agree	Kind agree	A,C,G,B,D,F,E,H
36	2022-11-26 17:33:54	Jani Kangas	Finland		Male	31			> 30	>4	Grupuk, Tanjung Aan	Rent/hired motorcycle	Simple	Easy	Easy	Don't know	Less good	Less good	Less good	Less good	Less good	Less good	Less good	Agree	Agree	Agree	Agree	Agree	Agree	Agree	Agree	Agree	Agree	Agree	Agree	Agree	Agree	d,
37	2022-11-26 17:34:40	Nerwin G	Swiss		Male	28	School	Costumer Care	20,0 - < 30,0	1	Around Lombok	Rent/hired motorcycle	Simple, Affordable	Easy	Easy	Few	Less good	Good	Good	Good	Less good	Less good	Good	Agree	Absolutely agree	Agree	Agree	Absolutley disagree	Kinda agree	Kinda agree	Agree	Absolutely agree	Kind agree	Kind agree	Agree	Absolutely agree	Agree	F,D,G,H,E,C,B,A
38	2022-11-26 17:41:24	Martina Hannhart	Switzerland	+41782306620	Female	34		Marketing	20,0 - < 30,0	1	Bali, Lombok (Are Guling), Tanjung Aan	Rent/hired motorcycle	Simple	Easy	Easy	Don't know	Good	Good	Less good	Good	Less good	Bad	Good	Agree	Agree	Agree	Agree	Kinda agree	Kinda agree	Kinda agree	Absolutely agree	Absolutely agree	Absolutely agree	Absolutely agree	Absolutely agree	Absolutely agree	Absolutely agree	B,C,D,F,E,G,H,A
39	2022-11-27 09:10:42	Michael	Frances	+33695062089	Male	60	S1	Retired bank, rent house	> 30	>4	Beaches (lunch,berenang, snorkling dan merenung)	Rent/hired car	Simple, Flexible, Affordable, Free, price 55 thousand day	Very easy	Very easy	Fewest	Worst	Worst	Worst	Worst	Worst	Worst	Worst	Absolutely agree	Absolutely agree	Kinda agree	Agree	Kinda agree	Kinda agree	Kinda agree	Kind agree	Kind agree	Kind agree	Kind agree	Kind agree	Kind agree	Kind agree	D,b, f
40	2022-11-27 14:29:29	Johan	Sweden		Male	21	High school	Dive Instructor	7,5 - < 10,0	1	Kuta	Private motorcycle	Simple						Good					Agree	Agree	Agree	Agree	Kinda agree	Kinda agree	Absolutely agree					Agree			c, d, a, b, f, e, g, h
41	2022-11-27 15:02:23	Maril	The Netherlands	0611205201	Female	27	Hospitality Student		20,0 - < 30,0	1	Kuta	Rent/hired motorcycle	Fast travel time, Comfortable, Simple, Flexible, Affordable	Easy	Easy	Don't know	Good	Good	Good	Good	Good	Good	Good	Absolutely agree	Absolutely agree	Absolutely agree	Absolutely agree	Agree	Absolutely agree	Agree								d,b,g,c,a,h,e
42	2022-11-27 15:06:06	Floris van Duuren	Netherlands	+32611599123	Male	30	University	None	> 30	1	beach	Rent/hired motorcycle	Fast travel time, Flexible, Affordable	Difficult	Easy	Don't know	Good	Good	Good	Good	Good	Less good	Good	Agree	Absolutely agree	Kinda agree	Disagree	Disagree	Kinda agree	Kinda agree	Disagree	Disagree	Disagree	Disagree	Kind agree	Kind agree	Disagree	b, d,f,g
43	2022-11-28 20:23:48	Piegera Boogers	Netherlands	+31691089117	Male	34	Hotel management applied science	Hotel manager	> 30	1	Kuta, Gerupak	Private car	Fast travel time	Difficult	Difficult	Don't know	Less good	Less good	Bad	Good	Good	Good	Less good	Agree	Agree	Agree	Kinda agree	Disagree	Kinda agree	Disagree	Disagree	Agree	Agree	Disagree	Agree	Kind agree	Disagree	D, A, E, F, H, B, C, G
44	2022-11-28 20:28:36	Eva Castevani	Italy	+393496769247	Female	23	Universiry	Veterinary	> 30	1	Beach	Rent/hired motorcycle	Simple, Flexible	Less difficult	Difficult		Bad	Less good	Bad		Less good	Less good	Less good	Absolutely agree	Kinda agree	Agree	Absolutely agree	Absolutely agree	Absolutely agree	Agree	Absolutely agree	Absolutely agree	Absolutely agree	Absolutely agree	Absolutely agree	Absolutely agree	Absolutely agree	F, G, E, A, B, C, D, H

## Sheet: coding
	Alamat (Kecamatan/Kabupaten/Negara)	Jenis Kelamin	Usia Responden	Pendidikan Terakhir	Pekerjaan responden	Pendapatan responden per bulan	frekuensi kunjungan ke lokasi Mandalika?	Objek wisata yang dituju pada lokasi KEK Mandalika?	Moda transportasi yang digunakan untuk menuju lokasi Mandalika (dari Bandara/Hotel/Rumah)?	Alasan memilih moda transportasi tersebut	Aksesibilitas/kemudahan untuk melakukan perjalanan menuju lokasi Mandalika?	Kesan terhadap jaringan dan rute jalan menuju lokasi Mandalika?	Kesan tentang ketersediaan layanan angkutan umum menuju lokasi Mandalika?	Kesan tentang kondisi layanan angkutan umum (yang anda gunakan) menuju lokasi Mandalika? [Keamanan]	Kesan kondisi layanan angkutan umum menuju lokasi Mandalika? [Kenyamanan]	Kesan anda tentang kondisi layanan angkutan umum (yang anda gunakan) menuju lokasi Mandalika? [Kecepatan]	Kesan kondisi layanan angkutan umum (yang anda gunakan) menuju lokasi Mandalika? [Keterjangkauan tarif]	Kesan kondisi layanan angkutan umum (yang anda gunakan) menuju lokasi Mandalika? [Ketersediaan setiap waktu]	Kesan kondisi layanan angkutan umum (yang anda gunakan) menuju lokasi Mandalika? [Keragaman jenis moda]	Kesan kondisi layanan angkutan umum (yang anda gunakan) menuju lokasi Mandalika? [Keragaman rute]	Berdasarkan pengalaman memanfaatkan aksesibilitas transportasi (sistem) tersedia menuju Mandalika, akan berkunjung kembali di waktu yang akan datang	Berdasarkan pengalaman memanfaatkan aksesibilitas transportasi (sistem) tersedia menuju Mandalika, akan merekomendasikan angkutan tersebut ke teman/keluarga/ orang lain untuk berkunjung ke Mandalika	perbaikan sistem transportasi menuju ke lokasi Mandalika merupakan faktor penting untuk lebih meningkatkan jumlah pengunjung dan frekuensi kunjungan.	Seberapa penting memperbaiki kondisi infrastruktur jalan menuju lokasi Mandalika?	Seberapa penting membangun infrastruktur jalan atau rute baru menuju lokasi wisata Mandalika?	Seberapa penting memperbaiki dan melengkapi fasilitas/ perlengkapan jalan (rambu, marka, Alat Pemberi Isyarat Lalu Lintas (Traffic Light)) menuju lokasi wisata Mandalika untuk menjamin keamanan perjalanan?	memperbaiki dan melengkapi fasilitas (Toilet, Rest Area, Pom Bensin/Mini ) menuju lokasi wisata Mandalika untuk menjamin keamanan perjalanan?	memperbaiki kondisi layanan angkutan umum eksisting menuju lokasi wisata Mandalika? (Jika pernah menggunakan angkutan umum) [Keamanan]	memperbaiki kondisi layanan angkutan umum eksisting menuju lokasi wisata Mandalika? (Jika pernah menggunakan angkutan umum) [Kenyamanan]	memperbaiki kondisi layanan angkutan umum eksisting menuju lokasi wisata Mandalika? (Jika pernah menggunakan angkutan umum) [Kecepatan]	memperbaiki kondisi layanan angkutan umum eksisting menuju lokasi wisata Mandalika? (Jika pernah menggunakan angkutan umum) [Keterjangkauan tarif]	memperbaiki kondisi layanan angkutan umum eksisting menuju lokasi wisata Mandalika? (Jika pernah menggunakan angkutan umum) [Ketersediaan setiap waktu]	memperbaiki kondisi layanan angkutan umum eksisting menuju lokasi wisata Mandalika? (Jika pernah menggunakan angkutan umum) [Keragaman jenis moda]	memperbaiki kondisi layanan angkutan umum eksisting menuju lokasi wisata Mandalika? (Jika pernah menggunakan angkutan umum) [Keragaman rute]	Urutan moda transportasi berikut dari yang paling disukai hingga yang paling tidak disukai a. Mobil pribadi b. Mobil sewa c. Motor pribadi d. Motor sewa e. Mobil travel / wisata f. Angkutan umum g.Transportasi online h. Sepeda Misalnya: c,a,g,b... dst.
1	Duren Sawit/DKI Jakarta/Indonesia	Perempuan	38 Tahun	D3	Swasta / Wiraswasta	7,5 - < 10,0 juta	Ke-2	Bukit Merese, Pantai Seger	Mobil sewa	Waktu tempuh yang cepat, Aman, Nyaman, Praktis, Fleksibel, Biaya terjangkau	Mudah	Agak baik	Sedikit	Baik	Baik	Baik	Baik	Agak baik	Buruk	Agak baik	Sangat setuju	Setuju	Setuju	Sangat penting	Penting	Sangat penting	Sangat penting	Sangat penting	Sangat penting	Sangat penting	Sangat penting	Sangat penting	Sangat penting	Sangat penting	a,c,d,e,f,g,h
2	Selaparang	Laki laki	32 Tahun	SMA	Swasta / Wiraswasta	< 2,5 juta	>4 kali	Pantai	Motor pribadi	Milik sendiri	Sangat mudah	Baik	Sangat sedikit	Baik	Baik	Baik	Agak baik	Agak baik	Buruk	Buruk	Sangat setuju	Sangat setuju	Sangat setuju	Sangat penting	Sangat penting	Sangat penting	Sangat penting	Sangat penting	Sangat penting	Sangat penting	Sangat penting	Sangat penting	Sangat penting	Sangat penting	c,a,d,b,h,f,g,e
3	Bandung	Laki laki	40Tahun	S3	PNS/BUMN	> 30 juta	Ke-4	Pantai	Mobil sewa	Praktis	Agak mudah	Baik	Sangat sedikit	Agak baik	Agak baik	Agak baik	Buruk	Sangat buruk	Sangat buruk	Buruk	Sangat tidak setuju	Sangat tidak setuju	Setuju	Sangat penting	Sangat penting	Sangat penting	Sangat penting	Agak penting	Agak penting	Agak penting	Agak penting	Agak penting	Agak penting	Agak penting	A, f, g
4	Kamasan monjok/Selaparang/Mataram/Indonesia	Perempuan	20 Tahun	SMA	Mahasiswa		>4 kali	bukit merese dan bukit seger	Motor pribadi	Waktu tempuh yang cepat	Mudah	Baik	Tidak tahu	Baik	Baik	Baik	Baik	Baik	Baik	Baik	Setuju	Setuju	Setuju	Sangat penting	Penting	Sangat penting	Sangat penting	Penting	Penting	Penting	Penting	Penting	Penting	Penting	C, A, E, G , F
5	Jagakarsa jakarta selatan	Laki laki	30 Tahun	S1	Wirausaha	2,5 - < 5,0 juta	>4 kali	Bukit marese / tasty hesty cafe	Mobil pribadi	Milik sendiri	Sulit	Buruk	Sangat sedikit	Agak baik	Agak baik	Agak baik	Buruk	Agak baik	Buruk	Agak baik	Sangat setuju	Tidak setuju	Sangat setuju	Sangat penting	Agak penting	Sangat penting	Sangat penting	Sangat penting	Sangat penting	Penting	Sangat penting	Sangat penting	Sangat penting	Penting	A,C,B,D,E,G,F,H
6	Praya, Jonggat, Loteng	Laki laki	25 Tahun	SMA	PNS/BUMN	2,5 - < 5,0 juta	>4 kali	pantai	Motor pribadi	Aman, Nyaman, Fleksibel, Biaya terjangkau, Milik sendiri	Agak mudah	Baik	Cukup banyak	Baik	Baik	Baik	Baik	Agak baik	Baik	Baik	Sangat setuju	Setuju	Sangat setuju	Sangat penting	Sangat penting	Sangat penting	Penting	Penting	Penting	Penting	Penting	Penting	Penting	Penting	c, e, h
7	Setiabudi, Jakarta, Indonesia	Perempuan	23 Tahun	S1	Swasta / Wiraswasta	10,0 - < 15,0 juta	Ke-1	Sirkuit, pantai	Mobil pribadi	Waktu tempuh yang cepat, Aman, Nyaman, Praktis, Fleksibel, Biaya terjangkau	Agak mudah	Sangat baik	Tidak tahu	Agak baik	Agak baik	Agak baik	Agak baik	Agak baik	Agak baik	Agak baik	Setuju	Setuju	Sangat setuju	Sangat penting	Sangat penting	Sangat penting	Sangat penting	Sangat penting	Sangat penting	Sangat penting	Sangat penting	Sangat penting	Sangat penting	Sangat penting	A, b, e, g, c, d, f
8	Karangpanas, Ampenan	Perempuan	21 Tahun	S1	Mahasiswi	< 2,5 juta	>4 kali	Pantai Kuta	Motor pribadi	Nyaman	Mudah	Baik	Cukup banyak	Baik	Baik	Baik	Baik	Baik	Baik	Baik	Setuju	Setuju	Setuju	Penting	Penting	Penting	Penting	Sangat penting	Sangat penting	Sangat penting	Sangat penting	Sangat penting	Sangat penting	Sangat penting	a, c, e, f, g, b, d, h
9	Jerowaru, Lombok Timur	Perempuan	23 Tahun	S1	Swasta / Wiraswasta	10,0 - < 15,0 juta	Ke-3	Sepeda listrik	Motor pribadi	Nyaman, Praktis, Biaya terjangkau, Milik sendiri	Mudah	Baik	Sangat sedikit	Baik	Baik	Baik	Baik	Baik	Baik	Baik	Setuju	Agak setuju	Sangat setuju	Sangat penting	Penting	Penting	Sangat penting	Penting	Penting	Penting	Penting	Penting	Penting	Penting	a, c, b, e, g, f, d, h
10	Lamongan, Lamongan, Indonesia	Laki laki	26 Tahun	S1	Swasta / Wiraswasta	5,0 - < 7,5 juta	Ke-1	Pantai kuta	Mobil pribadi	Stigma sosial/prestige	Agak mudah	Baik	Tidak tahu	Baik	Sangat baik	Sangat baik	Baik	Baik	Baik	Baik	Setuju	Sangat setuju	Sangat setuju	Sangat penting	Penting	Sangat penting	Sangat penting	Sangat penting	Sangat penting	Penting	Sangat penting	Sangat penting	Sangat penting	Sangat penting	F, g, e, b, c, a, h
11	Mataram	Laki laki	38 Tahun	SMA	Ibu Rumah Tangga		>4 kali	Pantai, motor listrik	Mobil pribadi	tidak ada kendaraan umum	Sangat mudah	Baik	Sangat sedikit	Baik	Baik	Baik	Baik	Baik	Baik	Baik	Sangat setuju	Setuju	Setuju	Sangat penting	Tidak penting	Sangat penting	Sangat penting	Penting	Penting	Penting	Penting	Penting	Penting	Penting	a, b, e, c, d, f, g, h
12	Lombok Tengah	Perempuan	40 Tahun	Sma	Swasta / Wiraswasta	2,5 - < 5,0 juta	Ke-2	Pantai	Mobil pribadi	Aman	Mudah	Baik	Sedikit	Baik	Baik	Baik	Baik	Baik	Baik	Baik	Setuju	Setuju	Setuju	Penting	Penting	Penting	Penting	Penting	Penting	Penting	Penting	Penting	Penting	Penting	A,b,c,d,e,f,g,h
13	Seketeng, Sumbasa besar	Perempuan	23 Tahun	SMA		< 2,5 juta	Ke-1	Sirkuit	Motor pribadi	Milik sendiri	Mudah	Baik	Cukup banyak	Baik	Baik	Baik	Baik	Agak baik	Baik	Baik	Sangat setuju	Setuju	Sangat setuju	Sangat penting	Sangat penting	Sangat penting	Sangat penting	Sangat penting	Sangat penting	Sangat penting	Sangat penting	Sangat penting	Sangat penting	Sangat penting	a, c, b, d, f, e, g, h
14	Praya Timur	Laki laki	29 Tahun	S1	Swasta / Wiraswasta	< 2,5 juta	>4 kali	Aan, Seger, Merese	Motor pribadi	Waktu tempuh yang cepat, Nyaman, Biaya terjangkau, Milik sendiri	Sulit	Agak baik	Sedikit	Agak baik	Baik	Agak baik	Agak baik	Buruk	Buruk	Sangat baik	Sangat setuju	Setuju	Sangat setuju	Agak penting	Sangat tidak penting	Penting	Sangat penting	Penting	Penting	Agak penting	Agak penting	Sangat penting	Penting	Tidak penting	c, f, d, a, b, g, h
15	Finland	Perempuan	22 Tahun	S1	Arsitek	15,0 - < 20,0 juta		Pantai tanjung Aan	Motor sewa	Fleksibel, Biaya terjangkau	Sulit	Baik	Tidak tahu	Baik	Agak baik	Baik	Baik	Agak baik	Agak baik	Agak baik	Agak setuju	Agak setuju	Agak setuju	Penting	Tidak penting	Penting	Penting	Penting	Sangat penting	Tidak penting	Agak penting	Penting	Penting	Agak penting	D,c,b,a,f,e,g,h
16	Tenara, Lombok Timur	Laki laki	45 Tahun	SMA	Swasta / Wiraswasta	5,0 - < 7,5 juta	>4 kali	Sirkuit, bukit merese, tanjung Aan, kuta	Motor pribadi	Aman, Nyaman, Praktis, Milik sendiri	Sangat mudah	Sangat baik	Sangat sedikit	Baik	Buruk	Buruk	Buruk	Buruk	Buruk	Sangat buruk	Sangat setuju	Setuju	Sangat setuju	Agak penting	Tidak penting	Penting	Penting	Penting	Penting	Penting	Penting	Penting	Penting	Penting	A,b,e,f,g
17	Penujak, Loteng	Laki laki	25 Tahun	SMA	Swasta / Wiraswasta	< 2,5 juta	>4 kali	Tanjung Aan, Sirkuit Mandalika, Bukit Merese, Pantai Seger	Mobil pribadi	Aman, Nyaman	Agak mudah		Sangat sedikit	Agak baik	Baik	Baik	Buruk	Baik	Buruk	Baik	Sangat setuju	Setuju	Sangat setuju	Sangat penting	Penting	Sangat penting	Penting	Penting	Agak penting	Tidak penting	Penting	Tidak penting	Penting	Tidak penting	a,c,g,b,d,f,h
18	Finland	Perempuan	28 Tahun	S1	Traveller	> 30 juta	>4 kali	Grupuk, Tanjung Aan, Kuta	Mobil sewa	Waktu tempuh yang cepat	Sangat mudah	Sangat baik	Tidak tahu	Baik	Baik	Baik	Baik	Baik	Baik	Baik	Sangat setuju	Setuju	Setuju	Penting	Penting	Sangat penting	Penting	Penting	Penting	Penting	Penting	Penting	Penting	Penting	A,b,c,d,e,f,g,h
19	Gunung Sari, Lobar	Laki laki	22 Tahun	S1	Swasta / Wiraswasta	< 2,5 juta	>4 kali	Tanjunh Aan,	Motor pribadi	Aman, Biaya terjangkau	Sangat mudah	Baik	Sangat sedikit	Baik	Baik	Baik	Baik	Baik	Baik	Baik	Sangat setuju	Setuju	Agak setuju	Penting	Agak penting	Penting	Agak penting	Penting	Sangat penting	Penting	Tidak penting	Sangat penting	Penting	Penting	C, D, G,B,E,A,F,H
20	Lombok Timur (Batam)	Laki laki	21 Tahun	S1	Mahasiswa	< 2,5 juta	>4 kali	Kuta, Tanjung Aan, Bukit Merese	Motor pribadi	Waktu tempuh yang cepat, Nyaman, Praktis, Fleksibel, Biaya terjangkau	Agak mudah	Agak baik	Sangat sedikit	Baik	Baik	Baik	Baik	Baik	Baik	Baik	Setuju	Sangat setuju	Sangat setuju	Penting	Sangat tidak penting	Penting	Sangat penting	Sangat penting	Agak penting	Penting	Penting	Sangat penting	Sangat penting	Penting	C, A, D, F, B, G, H
21	Sakra Barat, Lotim	Laki laki	20 Tahun	S1	Mahasiswa	< 2,5 juta	>4 kali	Kuta, Tanjung Aan	Motor pribadi	Waktu tempuh yang cepat, Nyaman, Biaya terjangkau	Mudah	Baik	Sangat sedikit	Baik	Baik	Baik	Baik	Baik	Baik	Baik	Setuju	Setuju	Setuju	Penting	Sangat tidak penting	Penting	Agak penting	Penting		Penting	Penting	Penting	Penting	Penting	C, D, A, B, F, E, G, H
22	Nyerot, Lombok Tengah	Laki laki	43 Tahun	SD	Swasta / Wiraswasta	< 2,5 juta	>4 kali	Pantai Aan	Mobil pribadi	Aman, Nyaman	Mudah	Sangat baik	Tidak tahu	Baik	Baik	Baik	Baik	Baik	Baik	Baik	Sangat setuju	Sangat setuju	Setuju	Penting	Penting	Penting	Penting	Penting	Penting	Penting	Agak penting	Penting	Penting	Penting	a, c, b, d
23	Kopang, Kab Lombok Tengah	Laki laki	27 Tahun	S1	Swasta / Wiraswasta	2,5 - < 5,0 juta	>4 kali	Pantai, Sirkuit	Mobil pribadi	Nyaman, Praktis, Fleksibel	Sangat mudah	Baik	Cukup banyak	Agak baik	Baik	Baik	Baik	Baik	Agak baik	Agak baik	Setuju	Setuju	Setuju	Sangat penting	Sangat penting	Sangat penting	Sangat penting	Penting	Penting	Penting	Sangat penting	Sangat penting	Sangat penting	Penting	c, a, b, d, g, f, e, h
24	Ireland	Perempuan	26 Tahun	S1	Swasta / Wiraswasta	> 30 juta	Ke-2	Pantai, air terjun	Motor Sewa	Aman, Nyaman, Biaya terjangkau, Ketemu banyak orang lokal	Mudah	Baik	Tidak tahu	Baik	Baik	Baik	Baik	Baik	Baik	Baik	Sangat setuju	Setuju	Setuju	Tidak penting	Tidak penting	Penting	Penting	Sangat penting	Sangat penting	Sangat penting	Sangat penting	Sangat penting	Sangat penting	Sangat penting	D, b, f
25	Desa Jago, Kec Praya, Kab Lombok Tengah	Laki laki	35 Tahun	S1	PNS/BUMN	2,5 - < 5,0 juta	>4 kali	Tanjung Aan	Mobil pribadi	Waktu tempuh yang cepat, Aman, Nyaman, Praktis, Fleksibel, Biaya terjangkau, Milik sendiri	Sangat mudah	Baik	Sedikit	Baik	Baik	Baik	Baik	Baik	Baik	Baik	Setuju	Sangat setuju	Sangat setuju	Penting	Sangat penting	Sangat penting	Sangat penting	Sangat penting	Sangat penting	Sangat penting	Sangat penting	Sangat penting	Sangat penting	Sangat penting	a, c, f, g, h, d, b
26	Sweden	Perempuan	20 Tahun	SMA	Swasta / Wiraswasta	> 30 juta	Ke-1	Kuta	Transportasi online	Aman	Sulit	Buruk	Cukup banyak	Sangat buruk	Sangat buruk	Sangat buruk	Sangat buruk	Sangat buruk	Sangat buruk	Sangat buruk	Sangat setuju	Setuju	Setuju	Agak penting	Sangat penting	Agak penting	Sangat penting	Tidak penting	Tidak penting	Tidak penting	Tidak penting	Tidak penting	Tidak penting	Tidak penting	A,g,h,b,c,d,f
27	Sweden	Laki laki	21 Tahun	SMA	TNI/POLRI	> 30 juta	Ke-1	Kuta	Motor sewa	Waktu tempuh yang cepat, Nyaman, Praktis, Fleksibel, Biaya terjangkau	Sangat sulit	Sangat baik	Tidak tahu	Sangat buruk	Baik	Baik	Baik	Baik	Baik	Baik	Setuju	Sangat setuju	Tidak setuju	Sangat penting	Penting	Sangat penting	Agak penting	Penting	Penting	Penting	Penting	Penting	Penting	Penting	D,b,a,g,h,e,c,f
28	Netherland	Perempuan	24 Tahun	S1	Manager	20,0 - < 30,0 juta	Ke-1	Kuta from labuan bajo	Motor Sewa	Waktu tempuh yang cepat, Nyaman, Fleksibel, Biaya terjangkau	Sulit	Baik	Tidak tahu	Baik	Baik	Baik	Agak baik	Baik	Baik	Sangat baik	Setuju	Sangat setuju	Setuju	Agak penting	Agak penting	Penting	Tidak penting	Tidak penting	Agak penting	Penting	Tidak penting	Penting	Penting	Agak penting	D,c,b,f,g,e,a,h
29	Kec.bolo/bima	Perempuan	19 Tahun	SMA	Mahasiswa		Ke-1	Bukit marese	Motor pribadi	Waktu tempuh yang cepat, Praktis, Biaya terjangkau, Milik sendiri	Agak mudah	Agak baik	Tidak tahu	Baik	Baik	Baik	Baik	Baik	Baik	Baik	Setuju	Setuju	Setuju	Penting	Tidak penting	Penting	Penting	Penting	Penting	Penting	Penting	Penting	Penting	Penting	C,a,e,g
30	Praya	Perempuan	41 Tahun	SMA		< 2,5 juta	>4 kali	Tanjung Aan, Bukit Merese	Motor pribadi	Fleksibel, Biaya terjangkau	Mudah		Sangat sedikit	Baik	Baik	Baik	Baik	Baik	Baik	Baik	Setuju	Setuju	Setuju	Tidak penting	Penting	Penting	Sangat penting	Sangat penting	Penting	Penting	Penting	Sangat penting	Sangat penting	Penting	C, A,G, F, D, B, E, H
31	Ende NTT (Mataram)	Perempuan	22 Tahun	SMA	Mahasiswa	< 2,5 juta	Ke-1	Bukit Merese	Motor pribadi	Waktu tempuh yang cepat, Praktis, Biaya terjangkau	Sulit	Buruk	Sangat sedikit	Baik	Baik	Baik	Baik	Baik	Baik	Baik	Sangat setuju	Setuju	Setuju	Penting	Tidak penting	Sangat penting	Sangat penting	Penting	Penting	Penting	Penting	Penting	Penting	Penting	C, A, E, D, B, F, H,
32	Asrama gebang 742 SWY	Laki laki	19 Tahun	SMA	Mahasiswa		Ke-2	Bukit Merese	Motor pribadi	Milik sendiri	Agak mudah	Sangat baik	Banyak	Baik	Sangat baik	Baik	Agak baik	Baik	Baik	Sangat baik	Setuju	Agak setuju	Sangat setuju	Sangat penting	Penting	Sangat penting	Sangat penting	Sangat penting	Sangat penting	Agak penting	Sangat penting	Agak penting	Penting	Sangat penting	A,c,f,e,b,d,g,h
33	Germany	Perempuan	28 Tahun	S1	Swasta / Wiraswasta	> 30	Ke-1	Pantai Tanjung Aan	Motor pribadi	Waktu tempuh yang cepat, Nyaman, Praktis, Milik Sendiri	Sulit	Baik	Cukup banyak	Baik	Baik	Buruk	Baik	Baik	Baik	Baik	Setuju	Sangat setuju	Setuju	Penting	Penting	Sangat penting	Sangat penting	Penting	Penting	Penting	Penting	Penting	Penting	Penting	D,B,G,C,A,F,E,H
34	Findland	Laki laki	22 Tahun	S1	Swasta / Wiraswasta	> 30	Ke-1	Gerupuk, Tanjunga Aan	Motor Sewa	Waktu tempuh yang cepat, Fleksibel, Biaya Terjangkau	Sulit	Baik	Tidak tahu	Baik	Baik	Baik	Baik	Baik	Bad	Agak baik	Setuju	Sangat setuju	Kinda agree	Agak penting	Sangat tidak penting	Penting	Penting	Penting	Agak penting	Agak penting	Penting	Penting	Sangat penting	Tidak penting	d, c, b, a, e, f, g, h
35	Germany	Perempuan	29 Tahun		Swasta / Wiraswasta	15,0 - < 20,0	Ke-1	Almost everywhere in Lombok	Motor pribadi	Personal/own the transportation	Mudah	Baik	Cukup banyak	Bad	Bad	Baik	Baik	Baik	Agak baik	Agak baik	Sangat setuju	Agak setuju	Setuju	Sangat penting	Disagree	Penting	Penting	Sangat penting	Sangat penting	Penting	Penting	Sangat penting	Sangat penting	Tidak penting	A,C,G,B,D,F,E,H
36	Finland	Laki laki	31 Tahun			> 30	>4	Grupuk, Tanjung Aan	Motor Sewa	Praktis	Mudah	Baik	Tidak tahu	Agak baik	Less good	Agak baik	Agak baik	Agak baik	Agak baik	Agak baik	Setuju	Setuju	Setuju	Penting	Penting	Penting	Penting	Penting	Penting	Penting	Penting	Penting	Penting	Penting	d,
37	Swiss	Laki laki	28 Tahun	S1	Swasta / Wiraswasta	20,0 - < 30,0	Ke-1	Around Lombok	Motor Sewa	Praktis, Biaya Terjangkau	Mudah	Baik	Cukup banyak	Agak baik	Baik	Baik	Baik	Agak baik	Agak baik	Baik	Setuju	Sangat setuju	Setuju	Penting	Sangat tidak penting	Agak penting	Agak penting	Penting	Sangat penting	Agak penting	Agak penting	Penting	Sangat penting	Penting	F,D,G,H,E,C,B,A
38	Switzerland	Perempuan	34 Tahun		Swasta / Wiraswasta	20,0 - < 30,0	Ke-1	Bali, Lombok (Are Guling), Tanjung Aan	Motor Sewa	Praktis	Mudah	Baik	Tidak tahu	Baik	Baik	Agak baik	Baik	Agak baik	Buruk	Baik	Setuju	Setuju	Setuju	Penting	Agak penting	Agak penting	Kinda agree	Sangat penting	Sangat penting	Sangat penting	Sangat penting	Sangat penting	Sangat penting	Sangat penting	B,C,D,F,E,G,H,A
39	Frances	Laki laki	60 Tahun	S1	Swasta / Wiraswasta	> 30	>4	Beaches (lunch,berenang, snorkling dan merenung)	Mobil Sewa	Praktis, Fleksibel, Biaya Terjangkau	Sangat mudah	Agak baik	Sangat sedikit	Buruk	Buruk	Buruk	Buruk	Buruk	Buruk	Buruk	Sangat setuju	Sangat setuju	Agak setuju	Penting	Agak penting	Agak penting	Agak penting	Agak penting	Agak penting	Agak penting	Agak penting	Agak penting	Agak penting	Agak penting	D,b, f
40	Sweden	Laki laki	21 Tahun	SMA	Swasta / Wiraswasta	7,5 - < 10,0	Ke-1	Pantai	Motor pribadi	Praktis				Baik	Baik	Baik	Baik	Baik	Buruk	Baik	Setuju	Setuju	Setuju	Penting	Agak penting	Agak penting	Sangat penting	Penting	Penting	Penting	Penting	Penting	Penting	Penting	c, d, a, b, f, e, g, h
41	The Netherlands	Perempuan	27 Tahun	D3		20,0 - < 30,0	Ke-1	Pantai	Motor Sewa	Waktu tempuh yang cepat, Nyaman, Praktis, Fleksibel, Biaya Terjangkau	Mudah	Baik	Tidak tahu	Baik	Baik	Baik	Baik	Baik	Baik	Baik	Sangat setuju	Sangat setuju	Sangat setuju	Sangat penting	Penting	Sangat penting	Penting	Penting	Penting	Penting	Penting	Penting	Penting	Penting	d,b,g,c,a,h,e
42	Netherlands	Laki laki	30 Tahun	S1		> 30	Ke-1	Pantai	Motor Sewa	Waktu tempuh yang cepat, Fleksibel, Biaya Terjangkau	Sulit	Baik	Tidak tahu	Baik	Baik	Baik	Baik	Baik	Agak baik	Baik	Setuju	Sangat setuju	Agak setuju	Tidak penting	Tidak penting	Agak penting	Agak penting	Tidak penting	Tidak penting	Tidak penting	Tidak penting	Agak penting	Agak penting	Tidak penting	b, d,f,g
43	Netherlands	Laki laki	34 Tahun	D3	Swasta / Wiraswasta	> 30	Ke-1	Kuta, Gerupak	Motor pribadi	Waktu tempuh yang cepat	Sulit	Buruk	Tidak tahu	Agak baik	Agak baik	Buruk	Baik	Baik	Baik	Agak baik	Setuju	Setuju	Setuju	Agak penting	Tidak penting	Agak penting	Tidak penting	Tidak penting	Penting	Penting	Tidak penting	Penting	Agak penting	Tidak penting	D, A, E, F, H, B, C, G
44	Italy	Perempuan	23 Tahun	S1	Swasta / Wiraswasta	> 30	Ke-1	Pantai	Motor Sewa	Praktis, Fleksibel	Agak Sulit	Buruk		Buruk	Agak baik	Buruk	Baik	Agak baik	Agak baik	Agak baik	Sangat setuju	Agak setuju	Setuju	Sangat penting	Sangat penting	Sangat penting	Penting	Sangat penting	Sangat penting	Sangat penting	Sangat penting	Sangat penting	Sangat penting	Sangat penting	F, G, E, A, B, C, D, H

## Sheet: Sheet6
Jenis Kelamin	Jumlah Jenis Kelamin	persenttase
Laki laki	24	0.545455
Perempuan	20	0.454545
Total	44	1
Usia Responden	Jumlah Usia Responden
19 Tahun	2
20 Tahun	3
21 Tahun	4
22 Tahun	4
23 Tahun	4
24 Tahun	1
25 Tahun	2
26 Tahun	1
26 Tahun	1
27 Tahun	2
28 Tahun	3
29 Tahun	2
30 Tahun	2
31 Tahun	1
32 Tahun	1
34 Tahun	2
35 Tahun	1
38 Tahun	1
38 Tahun	1
40 Tahun	1
40Tahun	1
41 Tahun	1
43 Tahun	1
45 Tahun	1
60 Tahun	1
Grand Total	44
Pendidikan	Jumlah Pendidikan Terakhir
D3	3
S1	21
S3	1
SD	1
SMA	15
(blank)
Grand Total	41
Pekerjaan Responden	Jumlah Pekerjaan responden
Arsitek	1
Ibu Rumah Tangga	1
Mahasiswa	6
Mahasiswi	1
Manager	1
PNS/BUMN	3
Swasta / Wiraswasta	23
TNI/POLRI	1
Traveller	1
Wirausaha	1
(blank)
Grand Total	39
Pendapatan Responden	Jumlah Pendapatan responden per bulan
< 2,5 juta	11
> 30	7
> 30 juta	5
10,0 - < 15,0 juta	2
15,0 - < 20,0	1
15,0 - < 20,0 juta	1
2,5 - < 5,0 juta	5
20,0 - < 30,0	3
20,0 - < 30,0 juta	1
5,0 - < 7,5 juta	2
7,5 - < 10,0	1
7,5 - < 10,0 juta	1
(blank)
Grand Total	40
frekuensi kunjungan	Jumlah frekuensi kunjungan ke lokasi Mandalika?
>4	2
>4 kali	17
Ke-1	18
Ke-2	4
Ke-3	1
Ke-4	1
(blank)
Grand Total	43
Objek wisata yang dituju pada lokasi KEK Mandalika	Jumlah Objek wisata yang dituju pada lokasi KEK Mandalika?
Aan, Seger, Merese	1
Almost everywhere in Lombok	1
Around Lombok	1
Bali, Lombok (Are Guling), Tanjung Aan	1
Beaches (lunch,berenang, snorkling dan merenung)	1
Bukit marese	1
Bukit marese / tasty hesty cafe	1
Bukit Merese	2
bukit merese dan bukit seger	1
Bukit Merese, Pantai Seger	1
Gerupuk, Tanjunga Aan	1
Grupuk, Tanjung Aan	1
Grupuk, Tanjung Aan, Kuta	1
Kuta	2
Kuta from labuan bajo	1
Kuta, Gerupak	1
Kuta, Tanjung Aan	1
Kuta, Tanjung Aan, Bukit Merese	1
Pantai	8
Pantai Aan	1
Pantai Kuta	2
Pantai tanjung Aan	2
Pantai, air terjun	1
Pantai, motor listrik	1
Pantai, Sirkuit	1
Sepeda listrik	1
Sirkuit	1
Sirkuit, bukit merese, tanjung Aan, kuta	1
Sirkuit, pantai	1
Tanjung Aan	1
Tanjung Aan, Bukit Merese	1
Tanjung Aan, Sirkuit Mandalika, Bukit Merese, Pantai Seger	1
Tanjunh Aan,	1
Grand Total	44
Moda Transportasi	Jumlah Moda transportasi yang digunakan untuk menuju lokasi Mandalika (dari Bandara/Hotel/Rumah)?
Mobil pribadi	9
Mobil sewa	4
Motor pribadi	19
Motor sewa	11
Transportasi online	1
Grand Total	44
Row Labels	Count of Alasan memilih moda transportasi tersebut
Aman	2
Aman, Biaya terjangkau	1
Aman, Nyaman	2
Aman, Nyaman, Biaya terjangkau, Ketemu banyak orang lokal	1
Aman, Nyaman, Fleksibel, Biaya terjangkau, Milik sendiri	1
Aman, Nyaman, Praktis, Milik sendiri	1
Fleksibel, Biaya terjangkau	2
Milik sendiri	4
Nyaman	1
Nyaman, Praktis, Biaya terjangkau, Milik sendiri	1
Nyaman, Praktis, Fleksibel	1
Personal/own the transportation	1
Praktis	4
Praktis, Biaya Terjangkau	1
Praktis, Fleksibel	1
Praktis, Fleksibel, Biaya Terjangkau	1
Stigma sosial/prestige	1
tidak ada kendaraan umum	1
Waktu tempuh yang cepat	3
Waktu tempuh yang cepat, Aman, Nyaman, Praktis, Fleksibel, Biaya terjangkau	2
Waktu tempuh yang cepat, Aman, Nyaman, Praktis, Fleksibel, Biaya terjangkau, Milik sendiri	1
Waktu tempuh yang cepat, Fleksibel, Biaya Terjangkau	2
Waktu tempuh yang cepat, Nyaman, Biaya terjangkau	1
Waktu tempuh yang cepat, Nyaman, Biaya terjangkau, Milik sendiri	1
Waktu tempuh yang cepat, Nyaman, Fleksibel, Biaya terjangkau	1
Waktu tempuh yang cepat, Nyaman, Praktis, Fleksibel, Biaya terjangkau	2
Waktu tempuh yang cepat, Nyaman, Praktis, Fleksibel, Biaya Terjangkau	1
Waktu tempuh yang cepat, Nyaman, Praktis, Milik Sendiri	1
Waktu tempuh yang cepat, Praktis, Biaya terjangkau	1
Waktu tempuh yang cepat, Praktis, Biaya terjangkau, Milik sendiri	1
Grand Total	44
Aksesibilitas perjalanan menuju lokasi Mandalika	Jumlah Aksesibilitas/kemudahan untuk melakukan perjalanan menuju lokasi Mandalika?
Agak mudah	8
Agak Sulit	1
Mudah	15
Sangat mudah	8
Sangat sulit	1
Sulit	10
(blank)
Grand Total	43
Kesan terhadap jaringan dan rute jalan menuju lokasi Mandalika	Jumlah Kesan terhadap jaringan dan rute jalan menuju lokasi Mandalika?
Agak baik	5
Baik	25
Buruk	5
Sangat baik	6
(blank)
Grand Total	41
Kesan tentang ketersediaan layanan angkutan umum menuju lokasi Mandalika	Jumlah Kesan tentang ketersediaan layanan angkutan umum menuju lokasi Mandalika?
Banyak	1
Cukup banyak	8
Sangat sedikit	13
Sedikit	4
Tidak tahu	16
(blank)
Grand Total	42
Kesan tentang kondisi layanan angkutan umum	Jumlah Kesan tentang kondisi layanan angkutan umum (yang anda gunakan) menuju lokasi Mandalika? [Keamanan]
Agak baik	9
Bad	1
Baik	30
Buruk	2
Sangat buruk	2
Grand Total	44
Kesan kondisi layanan angkutan umum menuju lokasi Mandalika? [Kenyamanan]	Jumlah Kesan kondisi layanan angkutan umum menuju lokasi Mandalika? [Kenyamanan]
Agak baik	6
Bad	1
Baik	31
Buruk	2
Less good	1
Sangat baik	2
Sangat buruk	1
Grand Total	44
Kesan anda tentang kondisi layanan angkutan umum (yang anda gunakan) menuju lokasi Mandalika? [Kecepatan]	Jumlah Kesan anda tentang kondisi layanan angkutan umum (yang anda gunakan) menuju lokasi Mandalika? [Kecepatan]
Agak baik	6
Baik	31
Buruk	5
Sangat baik	1
Sangat buruk	1
Grand Total	44
Kesan kondisi layanan angkutan umum (yang anda gunakan) menuju lokasi Mandalika? [Keterjangkauan tarif]	Jumlah Kesan kondisi layanan angkutan umum (yang anda gunakan) menuju lokasi Mandalika? [Keterjangkauan tarif]
Agak baik	6
Baik	32
Buruk	5
Sangat buruk	1
Grand Total	44
Kesan kondisi layanan angkutan umum (yang anda gunakan) menuju lokasi Mandalika? [Ketersediaan setiap waktu]	Jumlah Kesan kondisi layanan angkutan umum (yang anda gunakan) menuju lokasi Mandalika? [Ketersediaan setiap waktu]
Agak baik	11
Baik	28
Buruk	3
Sangat buruk	2
Grand Total	44
Kesan kondisi layanan angkutan umum (yang anda gunakan) menuju lokasi Mandalika? [Keragaman jenis moda]	Jumlah Kesan kondisi layanan angkutan umum (yang anda gunakan) menuju lokasi Mandalika? [Keragaman jenis moda]
Agak baik	8
Bad	1
Baik	24
Buruk	9
Sangat buruk	2
Grand Total	44
Kesan kondisi layanan angkutan umum (yang anda gunakan) menuju lokasi Mandalika? [Keragaman rute]	Jumlah Kesan kondisi layanan angkutan umum (yang anda gunakan) menuju lokasi Mandalika? [Keragaman rute]
Agak baik	10
Baik	26
Buruk	3
Sangat baik	3
Sangat buruk	2
Grand Total	44
Berdasarkan pengalaman memanfaatkan aksesibilitas transportasi (sistem) tersedia menuju Mandalika, akan berkunjung kembali di waktu yang akan datang	Jumlah Berdasarkan pengalaman memanfaatkan aksesibilitas transportasi (sistem) tersedia menuju Mandalika, akan berkunjung kembali di waktu yang akan datang
Agak setuju	1
Sangat setuju	19
Sangat tidak setuju	1
Setuju	23
Grand Total	44
Berdasarkan pengalaman memanfaatkan aksesibilitas transportasi (sistem) tersedia menuju Mandalika, akan merekomendasikan angkutan tersebut ke teman/keluarga/ orang lain untuk berkunjung ke Mandalika	Jumlah Berdasarkan pengalaman memanfaatkan aksesibilitas transportasi (sistem) tersedia menuju Mandalika, akan merekomendasikan angkutan tersebut ke teman/keluarga/ orang lain untuk berkunjung ke Mandalika
Agak setuju	5
Sangat setuju	13
Sangat tidak setuju	1
Setuju	24
Tidak setuju	1
Grand Total	44
perbaikan sistem transportasi menuju ke lokasi Mandalika merupakan faktor penting untuk lebih meningkatkan jumlah pengunjung dan frekuensi kunjungan.	Jumlah perbaikan sistem transportasi menuju ke lokasi Mandalika merupakan faktor penting untuk lebih meningkatkan jumlah pengunjung dan frekuensi kunjungan.
Agak setuju	4
Kinda agree	1
Sangat setuju	14
Setuju	24
Tidak setuju	1
Grand Total	44
Seberapa penting memperbaiki kondisi infrastruktur jalan menuju lokasi Mandalika?	Jumlah Seberapa penting memperbaiki kondisi infrastruktur jalan menuju lokasi Mandalika?
Agak penting	6
Penting	17
Sangat penting	18
Tidak penting	3
Grand Total	44
Seberapa penting membangun infrastruktur jalan atau rute baru menuju lokasi wisata Mandalika?	Jumlah Seberapa penting membangun infrastruktur jalan atau rute baru menuju lokasi wisata Mandalika?
Agak penting	6
Disagree	1
Penting	15
Sangat penting	9
Sangat tidak penting	5
Tidak penting	8
Grand Total	44
Seberapa penting memperbaiki dan melengkapi fasilitas/ perlengkapan jalan (rambu, marka, Alat Pemberi Isyarat Lalu Lintas (Traffic Light)) menuju lokasi wisata Mandalika untuk menjamin keamanan perjalanan?	Jumlah Seberapa penting memperbaiki dan melengkapi fasilitas/ perlengkapan jalan (rambu, marka, Alat Pemberi Isyarat Lalu Lintas (Traffic Light)) menuju lokasi wisata Mandalika untuk menjamin keamanan perjalanan?
Agak penting	7
Penting	17
Sangat penting	20
Grand Total	44
memperbaiki dan melengkapi fasilitas (Toilet, Rest Area, Pom Bensin/Mini ) menuju lokasi wisata Mandalika untuk menjamin keamanan perjalanan?	Jumlah memperbaiki dan melengkapi fasilitas (Toilet, Rest Area, Pom Bensin/Mini ) menuju lokasi wisata Mandalika untuk menjamin keamanan perjalanan?
Agak penting	6
Kinda agree	1
Penting	15
Sangat penting	20
Tidak penting	2
Grand Total	44
memperbaiki kondisi layanan angkutan umum eksisting menuju lokasi wisata Mandalika? (Jika pernah menggunakan angkutan umum) [Keamanan]	Jumlah memperbaiki kondisi layanan angkutan umum eksisting menuju lokasi wisata Mandalika? (Jika pernah menggunakan angkutan umum) [Keamanan]
Agak penting	2
Penting	23
Sangat penting	15
Tidak penting	4
Grand Total	44
memperbaiki kondisi layanan angkutan umum eksisting menuju lokasi wisata Mandalika? (Jika pernah menggunakan angkutan umum) [Kenyamanan]	Jumlah memperbaiki kondisi layanan angkutan umum eksisting menuju lokasi wisata Mandalika? (Jika pernah menggunakan angkutan umum) [Kenyamanan]
Agak penting	6
Penting	19
Sangat penting	16
Tidak penting	2
(blank)
Grand Total	43
memperbaiki kondisi layanan angkutan umum eksisting menuju lokasi wisata Mandalika? (Jika pernah menggunakan angkutan umum) [Kecepatan]	Jumlah memperbaiki kondisi layanan angkutan umum eksisting menuju lokasi wisata Mandalika? (Jika pernah menggunakan angkutan umum) [Kecepatan]
Agak penting	6
Penting	25
Sangat penting	9
Tidak penting	4
Grand Total	44
memperbaiki kondisi layanan angkutan umum eksisting menuju lokasi wisata Mandalika? (Jika pernah menggunakan angkutan umum) [Keterjangkauan tarif]	Jumlah memperbaiki kondisi layanan angkutan umum eksisting menuju lokasi wisata Mandalika? (Jika pernah menggunakan angkutan umum) [Keterjangkauan tarif]
Agak penting	6
Penting	20
Sangat penting	13
Tidak penting	5
Grand Total	44
memperbaiki kondisi layanan angkutan umum eksisting menuju lokasi wisata Mandalika? (Jika pernah menggunakan angkutan umum) [Ketersediaan setiap waktu]	Jumla memperbaiki kondisi layanan angkutan umum eksisting menuju lokasi wisata Mandalika? (Jika pernah menggunakan angkutan umum) [Ketersediaan setiap waktu]
Agak penting	4
Penting	21
Sangat penting	17
Tidak penting	2
Grand Total	44
memperbaiki kondisi layanan angkutan umum eksisting menuju lokasi wisata Mandalika? (Jika pernah menggunakan angkutan umum) [Keragaman jenis moda]	Jumlah memperbaiki kondisi layanan angkutan umum eksisting menuju lokasi wisata Mandalika? (Jika pernah menggunakan angkutan umum) [Keragaman jenis moda]
Agak penting	4
Penting	22
Sangat penting	17
Tidak penting	1
Grand Total	44
memperbaiki kondisi layanan angkutan umum eksisting menuju lokasi wisata Mandalika? (Jika pernah menggunakan angkutan umum) [Keragaman rute]	Jumlah memperbaiki kondisi layanan angkutan umum eksisting menuju lokasi wisata Mandalika? (Jika pernah menggunakan angkutan umum) [Keragaman rute]
Agak penting	4
Penting	22
Sangat penting	11
Tidak penting	7
Grand Total	44
